# Supplementary material
Source: PubMed Central journal article supplement (PMC4012689)

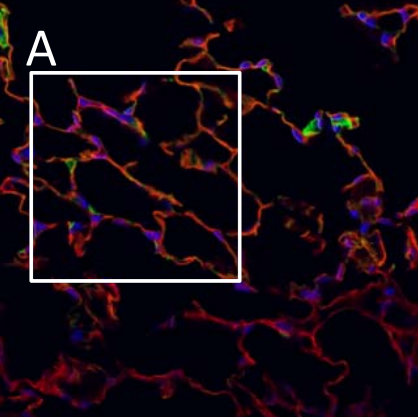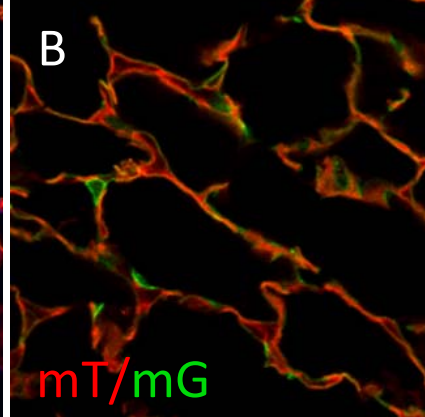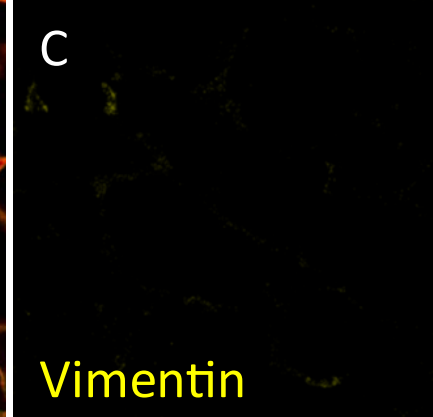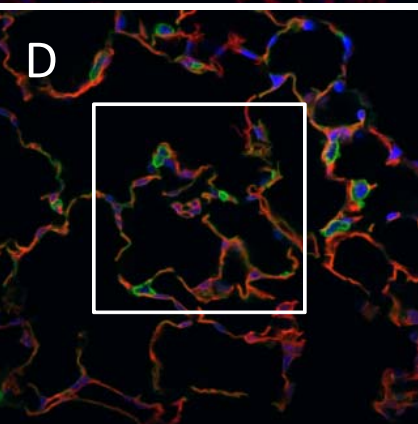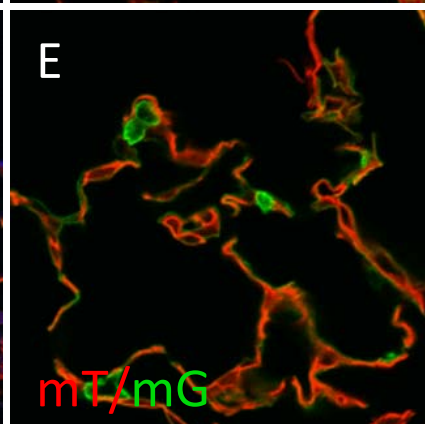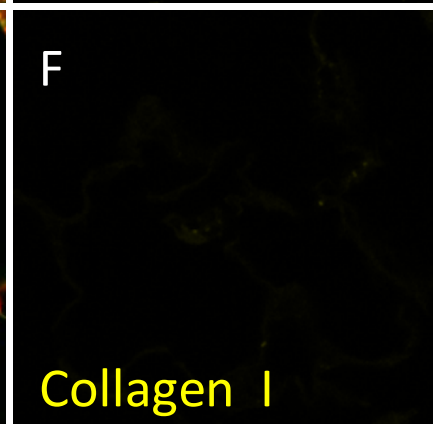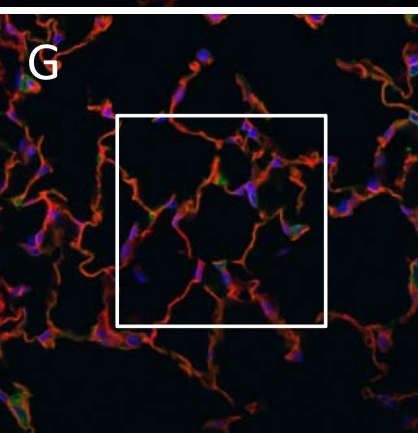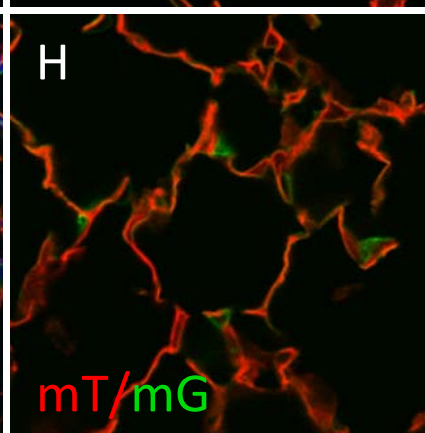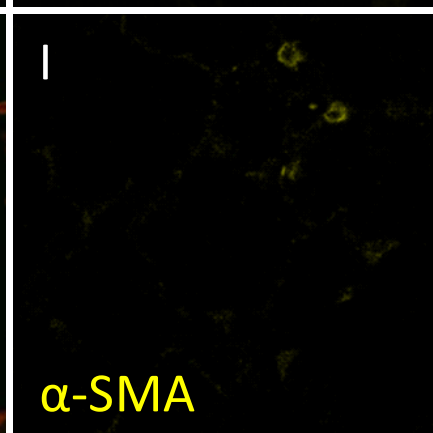

Fibronectin

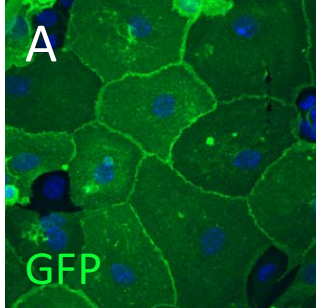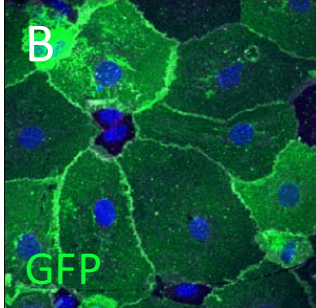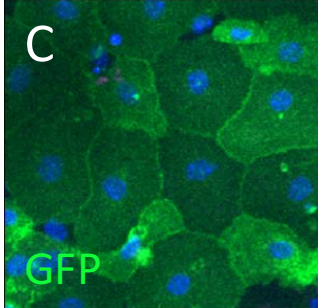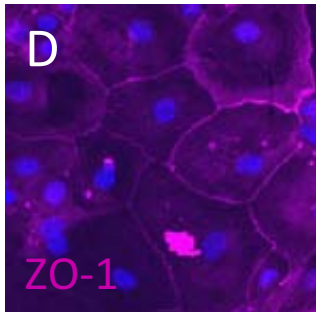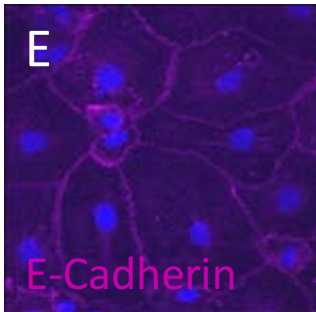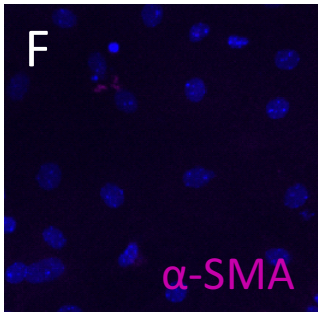

Fibronectin + TGF $\beta$ 1

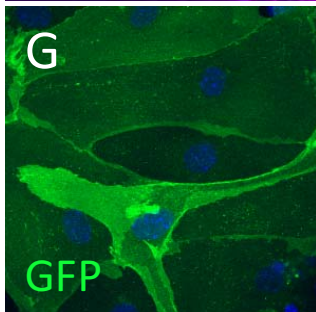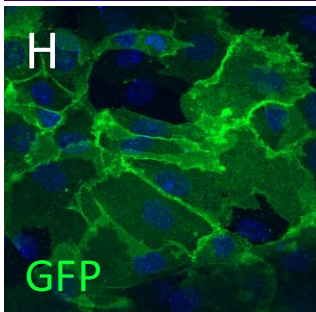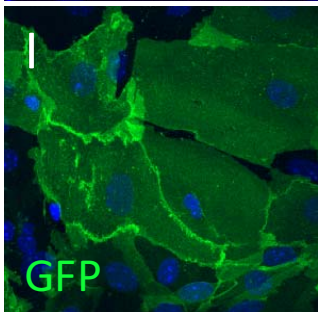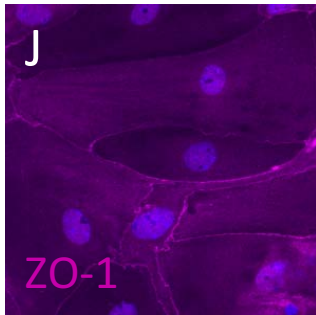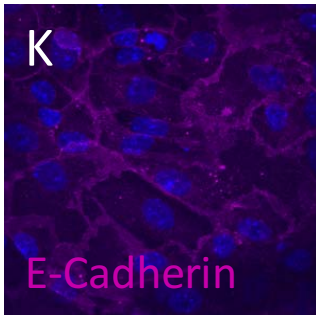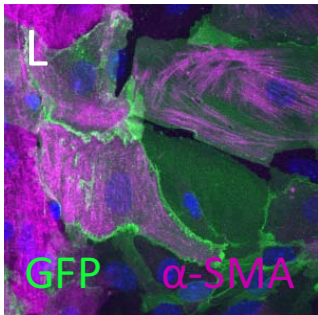

Laminin-5 + TGFβ1

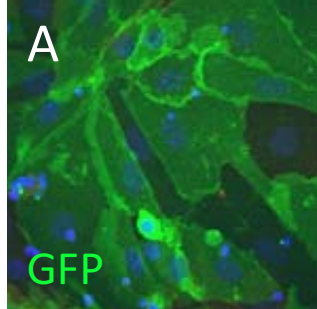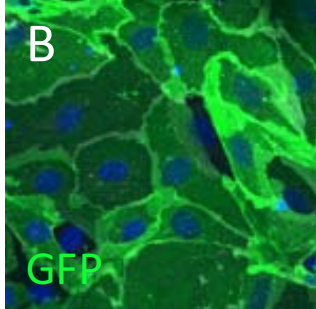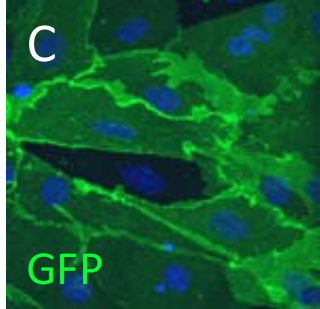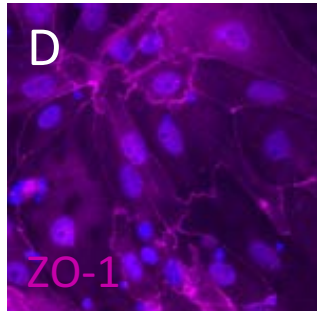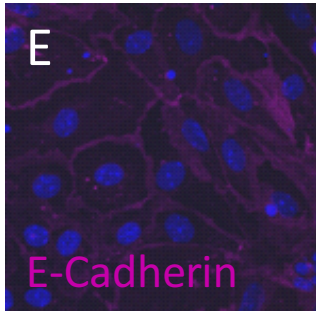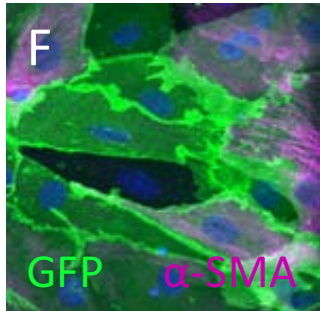

Collagen I + TGFβ1

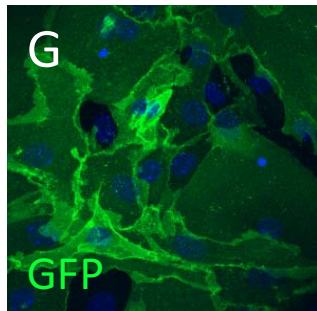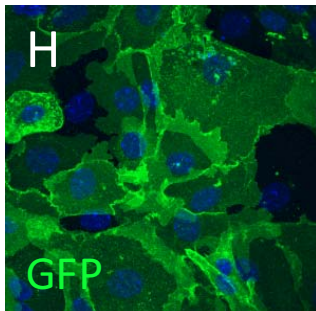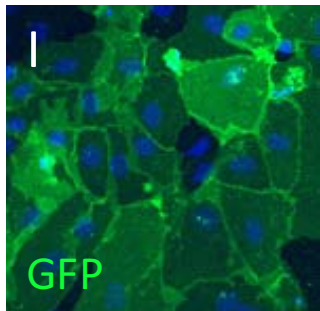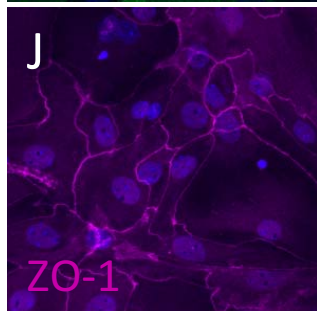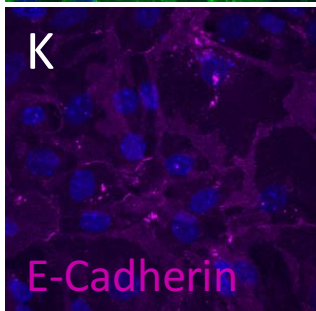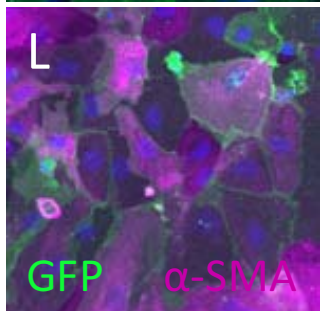

A

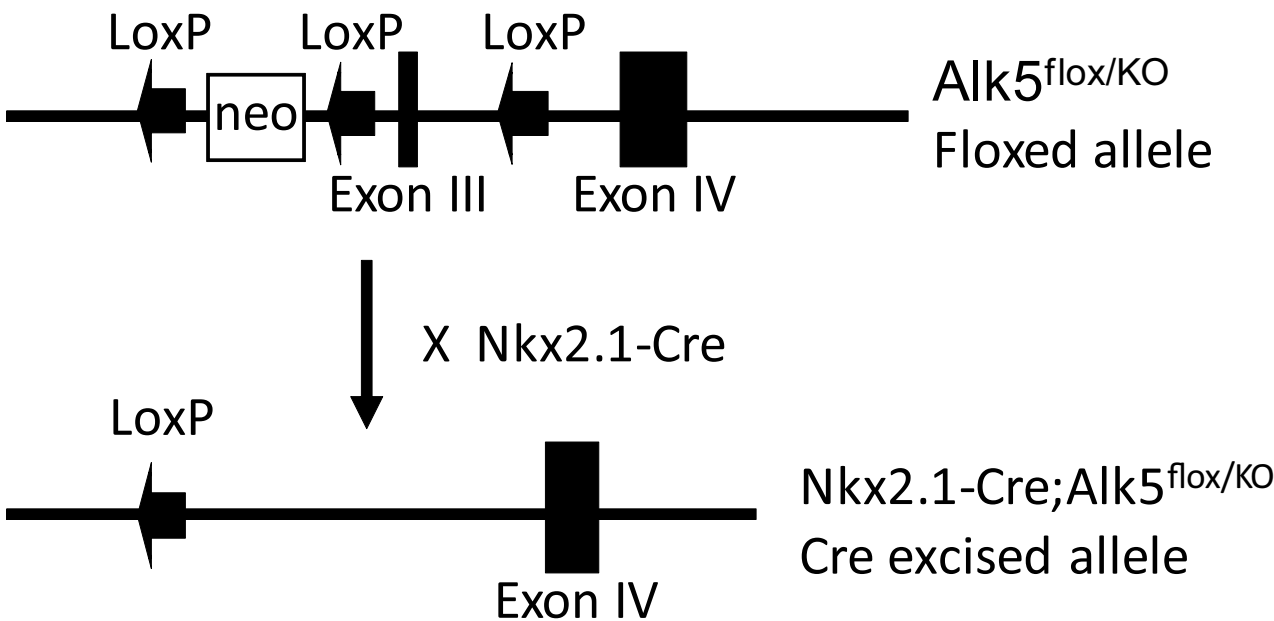

B

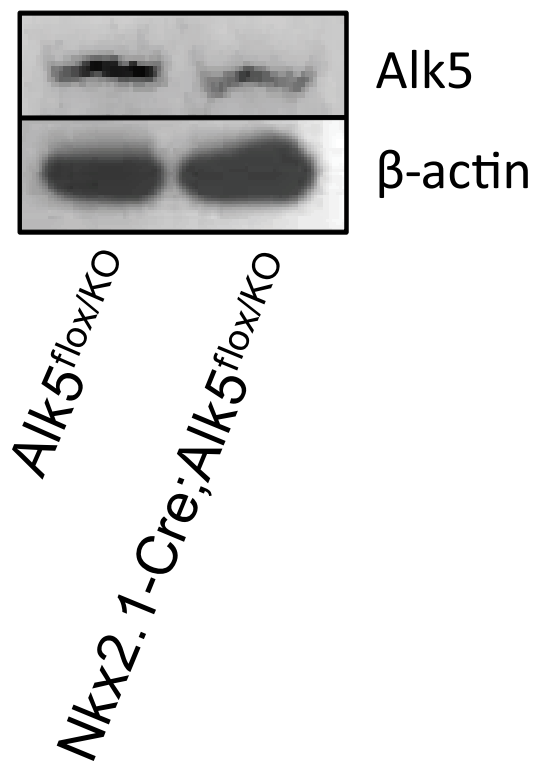

A

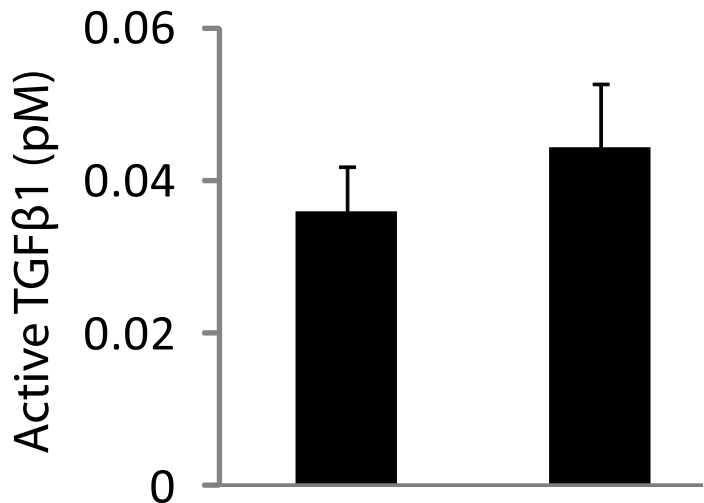

B

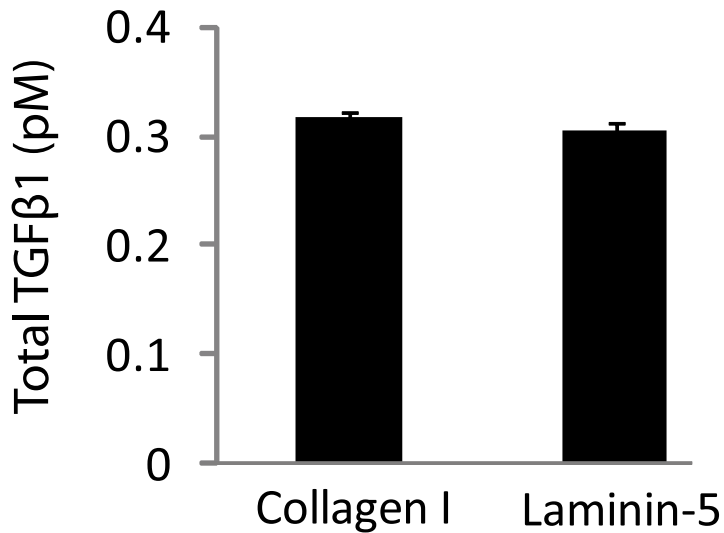

Supplement: NIHMS545762-supplement-Supp_Fig_S1-S5.pdf [file NIHMS545762-supplement-Supp_Fig_S1-S5.pdf]
